# Supplementary material
Source: PubMed Central journal article supplement (PMC7158803)
Supplement: mmc1.pdf [file mmc1.pdf]

| Day | Official data | Forecasts |         |       |      |           |
|-----|---------------|-----------|---------|-------|------|-----------|
|     |               | Linear    | Squared | Cubic | Exp  | STATA     |
| 1   | 132           | -744,7    | 321     | 39    | 194  | 38,5277   |
| 2   | 229           | -344,8    | 264     | 224   | 252  | 223,7636  |
| 3   | 322           | 55,1      | 278     | 386   | 328  | 386,1719  |
| 4   | 400           | 455,0     | 361     | 541   | 426  | 541,2668  |
| 5   | 650           | 854,9     | 515     | 705   | 554  | 704,5625  |
| 6   | 888           | 1254,8    | 740     | 892   | 720  | 891,5732  |
| 7   | 1049          | 1654,7    | 1034    | 1118  | 936  | 1117,8131 |
| 8   | 1694          | 2054,6    | 1399    | 1399  | 1216 | 1398,7964 |
| 9   | 1835          | 2454,5    | 1834    | 1750  | 1580 | 1750,0373 |
| 10  | 2263          | 2854,4    | 2339    | 2187  | 2053 | 2187,05   |
| 11  | 2706          | 3254,3    | 2915    | 2725  | 2668 | 2725,3487 |
| 12  | 3296          | 3654,2    | 3560    | 3380  | 3467 | 3380,4476 |
| 13  | 3916          | 4054,1    | 4277    | 4168  | 4506 | 4167,8609 |
| 14  | 5061          | 4454,0    | 5063    | 5103  | 5856 | 5103,1028 |
| 15  | 6378          | 4853,9    | 5919    | 6202  | 7610 | 6201,6875 |

| Interpolation | R squared | Coefficients |         |         |         |
|---------------|-----------|--------------|---------|---------|---------|
| Linear        | 0,8868    |              |         | 399,9   | -1144,6 |
| Squared       | 0,9876    |              | 35,129  | -162,17 | 447,93  |
| Cubic         | 0,9952    | 2,5857       | -26,928 | 247,92  | -185,05 |
| Exp.          | 0,9765    |              |         | 149,48  | 0,262   |

## Fitting model

### Hospital admission and time

$$Y = ax^3 + bx^2 + cx + d$$

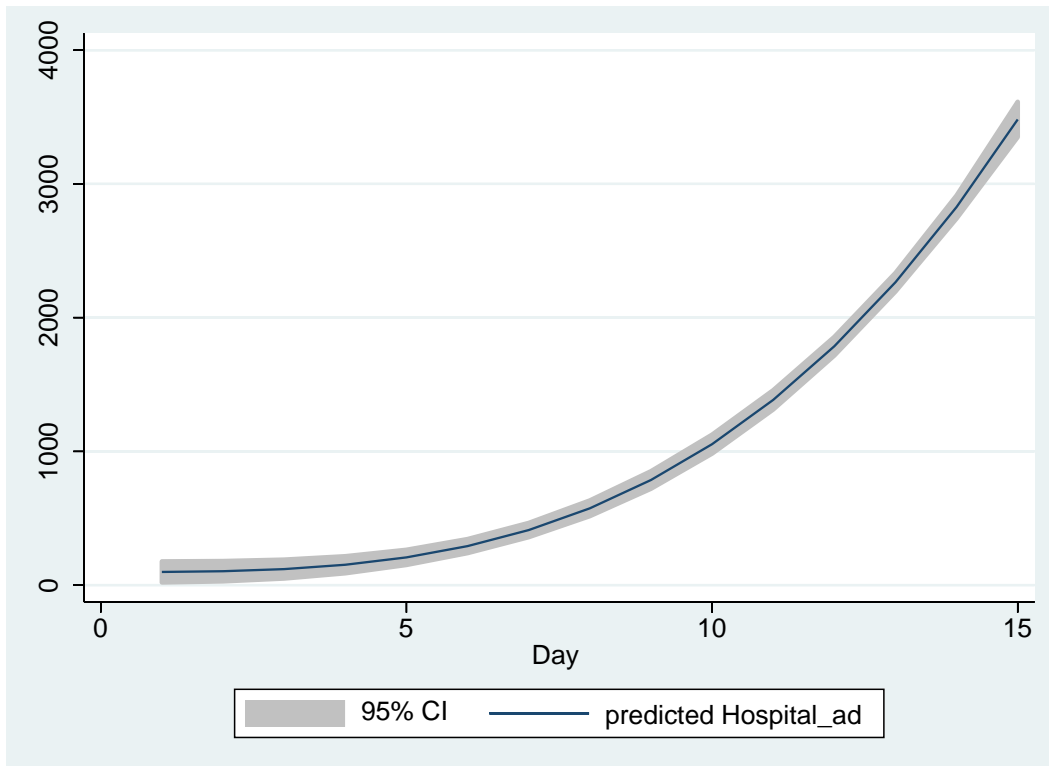

Computing average derivatives

Polynomial-series estimation                      Number of obs        =            15  
                                                                                 Polynomial order    =            3

| Hospital_ad | Effect   | Robust Std. Err. | z     | P> z  | [95% Conf. Interval] |          |
|-------------|----------|------------------|-------|-------|----------------------|----------|
| B           | 255.7217 | 7.585743         | 33.71 | 0.000 | 240.854              | 270.5895 |

Note: Effect estimates are averages of derivatives.

| Day | Official data | Forecast |         |       |      | STATA     |
|-----|---------------|----------|---------|-------|------|-----------|
|     |               | Linear   | Squared | Cubic | Exp  |           |
| 1   | 54            | -535,8   | 201     | 51    | 67   | 50,8652   |
| 2   | 101           | -311,2   | 110     | 89    | 90   | 88,5147   |
| 3   | 114           | -86,6    | 67      | 125   | 121  | 125,1572  |
| 4   | 128           | 138,0    | 73      | 169   | 163  | 169,0607  |
| 5   | 248           | 362,5    | 128     | 228   | 219  | 228,4932  |
| 6   | 345           | 587,1    | 231     | 312   | 294  | 311,7227  |
| 7   | 401           | 811,7    | 382     | 427   | 394  | 427,0172  |
| 8   | 639           | 1036,3   | 583     | 583   | 530  | 582,6447  |
| 9   | 742           | 1260,9   | 832     | 787   | 711  | 786,8732  |
| 10  | 1034          | 1485,4   | 1129    | 1048  | 955  | 1047,9707 |
| 11  | 1346          | 1710,0   | 1475    | 1374  | 1283 | 1374,2052 |
| 12  | 1790          | 1934,6   | 1870    | 1774  | 1723 | 1773,8447 |
| 13  | 2394          | 2159,2   | 2313    | 2255  | 2314 | 2255,1572 |
| 14  | 2651          | 2383,8   | 2805    | 2826  | 3108 | 2826,4107 |
| 15  | 3557          | 2608,3   | 3345    | 3496  | 4174 | 3495,8732 |

| Interpolation | R squared | Coefficients |         |         |         |
|---------------|-----------|--------------|---------|---------|---------|
| Linear        | 0,844     |              |         | 224,58  | -760,36 |
| Squared       | 0,9897    |              | 24,301  | -164,24 | 341,28  |
| Cubic         | 0,9962    | 1,378        | -8,7715 | 54,318  | 3,9407  |
| Exp.          | 0,9893    |              |         | 50,058  | 0,2949  |



| Day | Official data | Forecast |         |       |     |          |
|-----|---------------|----------|---------|-------|-----|----------|
|     |               | Linear   | Squared | Cubic | Exp | STATA    |
| 1   | 26            | -88,8    | 42      | 28    | 21  | 27,8677  |
| 2   | 27            | -45,6    | 29      | 27    | 28  | 27,2578  |
| 3   | 35            | -2,3     | 25      | 31    | 36  | 30,5553  |
| 4   | 36            | 40,9     | 29      | 39    | 46  | 38,5492  |
| 5   | 56            | 84,2     | 42      | 52    | 59  | 52,0285  |
| 6   | 64            | 127,4    | 64      | 72    | 76  | 71,7822  |
| 7   | 105           | 170,7    | 94      | 99    | 98  | 98,5993  |
| 8   | 140           | 213,9    | 133     | 133   | 126 | 133,2688 |
| 9   | 166           | 257,2    | 181     | 177   | 162 | 176,5797 |
| 10  | 229           | 300,4    | 237     | 229   | 209 | 229,321  |
| 11  | 295           | 343,7    | 302     | 292   | 269 | 292,2817 |
| 12  | 351           | 386,9    | 375     | 366   | 346 | 366,2508 |
| 13  | 462           | 430,2    | 458     | 452   | 446 | 452      |
| 14  | 567           | 473,5    | 548     | 550   | 574 | 550,3702 |
| 15  | 650           | 516,7    | 648     | 662   | 739 | 662,0985 |

| Interpolation | R squared | Coefficients |        |         |        |
|---------------|-----------|--------------|--------|---------|--------|
| Linear        | 0,8688    |              |        | 43,254  | -132,1 |
| Squared       | 0,9966    |              | 4,321  | -25,883 | 63,791 |
| Cubic         | 0,9982    | 0,1315       | 1,1647 | -5,0245 | 31,596 |
| Exp.          | 0,9901    |              |        | 16,638  | 0,2529 |



| Day | Official data | Forecast |         |       |     |          |
|-----|---------------|----------|---------|-------|-----|----------|
|     |               | Linear   | Squared | Cubic | Exp | STATA    |
| 1   | 5             | -57,4    | 28      | 0     | 5   | 0,1741   |
| 2   | 6             | -36,7    | 12      | 8     | 6   | 8,0582   |
| 3   | 10            | -16,0    | 2       | 12    | 8   | 12,4315  |
| 4   | 12            | 4,7      | -3      | 15    | 12  | 14,8162  |
| 5   | 12            | 25,3     | -2      | 17    | 16  | 16,7345  |
| 6   | 21            | 46,0     | 5       | 20    | 21  | 19,7086  |
| 7   | 29            | 66,7     | 17      | 25    | 29  | 25,2607  |
| 8   | 34            | 87,4     | 35      | 35    | 40  | 34,913   |
| 9   | 52            | 108,1    | 58      | 50    | 54  | 50,1877  |
| 10  | 79            | 128,8    | 88      | 73    | 74  | 72,607   |
| 11  | 107           | 149,5    | 122     | 104   | 101 | 103,6931 |
| 12  | 148           | 170,1    | 163     | 145   | 137 | 144,9682 |
| 13  | 197           | 190,8    | 209     | 198   | 187 | 197,9545 |
| 14  | 233           | 211,5    | 260     | 264   | 255 | 264,1742 |
| 15  | 366           | 232,2    | 317     | 345   | 348 | 345,1495 |

| Interpolation | R squared | Coefficients |         |         |         |
|---------------|-----------|--------------|---------|---------|---------|
| Linear        | 0,7599    |              |         | 20,686  | -78,086 |
| Squared       | 0,9668    |              | 2,8114  | -24,297 | 49,365  |
| Cubic         | 0,9902    | 0,2537       | -3,2776 | 15,941  | -12,743 |
| Exp.          | 0,9939    |              |         | 3,3328  | 0,3098  |



### Fitting model Recover and Time

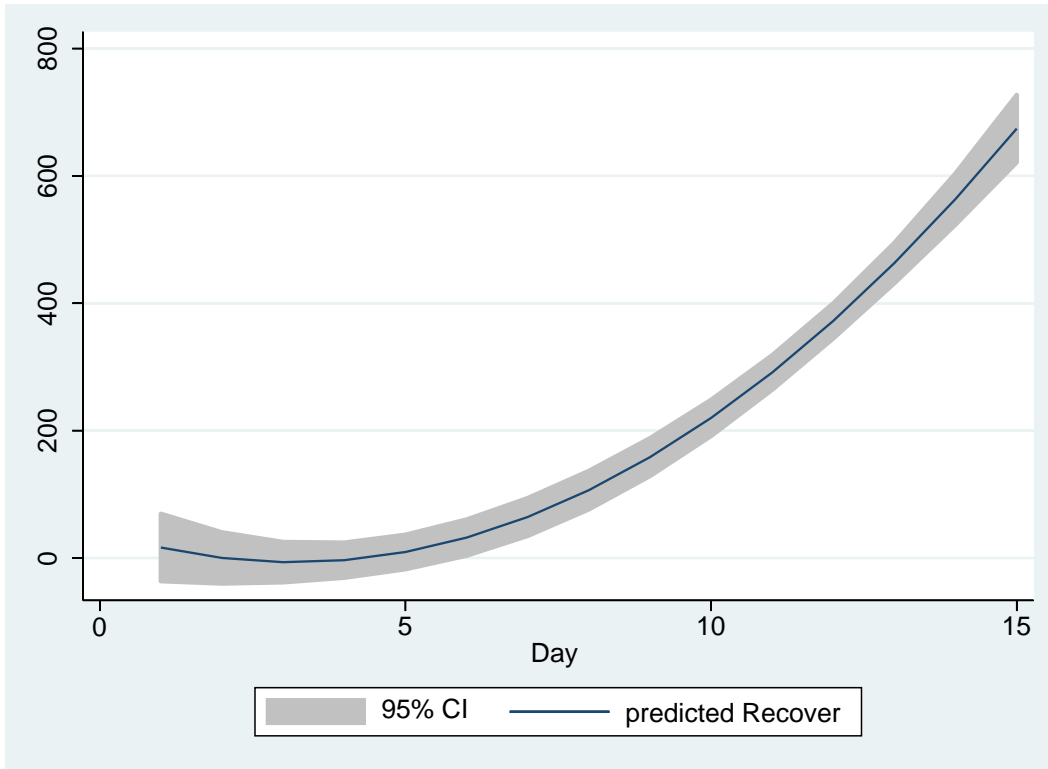

Computing average derivatives

Polynomial-series estimation      Number of obs = 15  
 Polynomial order = 3

| Recover | Effect   | Robust Std. Err. | z     | P> z  | [95% Conf. Interval] |          |
|---------|----------|------------------|-------|-------|----------------------|----------|
| B       | 46.88535 | 4.679378         | 10.02 | 0.000 | 37.71393             | 56.05676 |

Note: Effect estimates are averages of derivatives.

| Day | Official data | Forecast |         |       |     |          |
|-----|---------------|----------|---------|-------|-----|----------|
|     |               | Linear   | Squared | Cubic | Exp | STATA    |
| 1   | 0             | -131,4   | 16      | 17    | 0   | 16,9293  |
| 2   | 1             | -84,4    | 0       | 0     | 0   | 0,1236   |
| 3   | 1             | -37,5    | -7      | -7    | 0   | -6,7715  |
| 4   | 3             | 9,5      | -3      | -4    | 0   | -3,7824  |
| 5   | 45            | 56,5     | 9       | 9     | 0   | 9,0645   |
| 6   | 46            | 103,5    | 32      | 32    | 0   | 31,7428  |
| 7   | 50            | 150,5    | 64      | 64    | 0   | 64,2261  |
| 8   | 83            | 197,5    | 106     | 106   | 0   | 106,488  |
| 9   | 149           | 244,5    | 158     | 159   | 0   | 158,5021 |
| 10  | 160           | 291,4    | 220     | 220   | 0   | 220,242  |
| 11  | 276           | 338,4    | 291     | 292   | 0   | 291,6813 |
| 12  | 414           | 385,4    | 372     | 373   | 0   | 372,7936 |
| 13  | 523           | 432,4    | 463     | 464   | 0   | 463,5525 |
| 14  | 589           | 479,4    | 564     | 564   | 0   | 563,9316 |
| 15  | 622           | 526,4    | 674     | 674   | 0   | 673,9045 |

| Interpolation | R squared | Coefficients |        |         |         |
|---------------|-----------|--------------|--------|---------|---------|
| Linear        | 0,8452    |              |        | 46,986  | -178,42 |
| Squared       | 0,9793    |              | 4,8751 | -31,016 | 42,585  |
| Cubic         | 0,9793    | -0,0044      | 4,9817 | -31,72  | 43,672  |
| Exp.          |           |              |        |         |         |

## Fitting model

### ICU vs Hospital ad

$$Y=ax+b$$

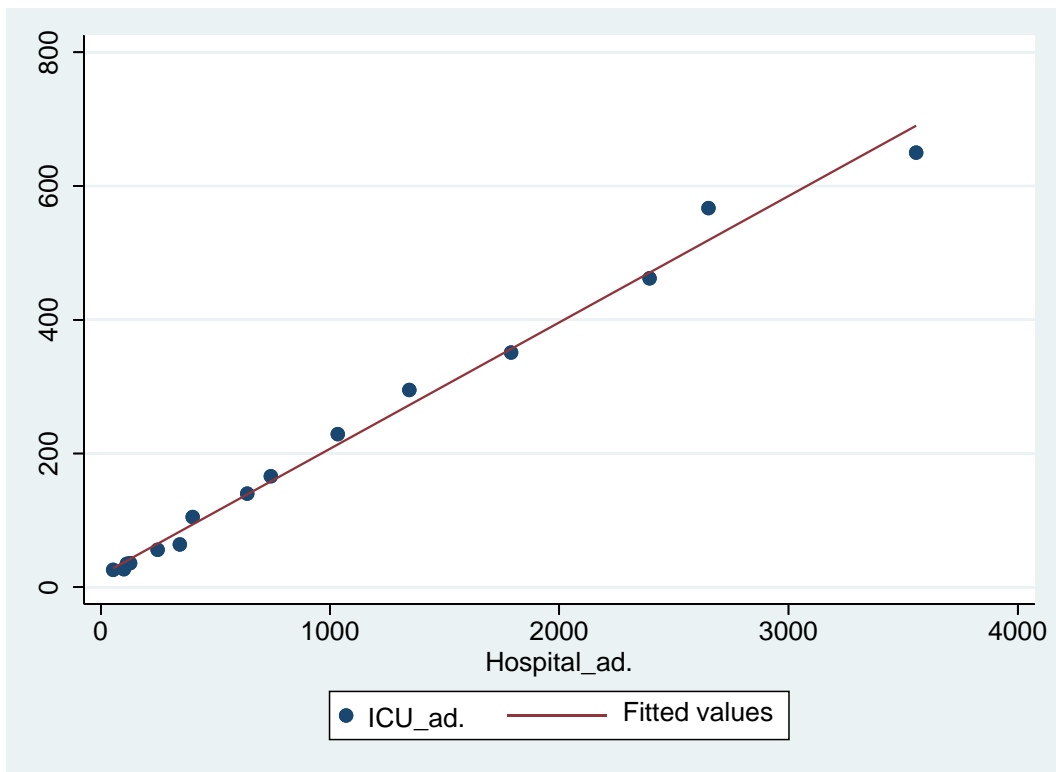

```
. regress ICU_ad Hospital_ad
```

| Source   | SS         | df | MS         | Number of obs | = | 15      |
|----------|------------|----|------------|---------------|---|---------|
| Model    | 597350.793 | 1  | 597350.793 | F(1, 13)      | = | 1392.64 |
| Residual | 5576.14077 | 13 | 428.933905 | Prob > F      | = | 0.0000  |
| Total    | 602926.933 | 14 | 43066.2095 | R-squared     | = | 0.9908  |
|          |            |    |            | Adj R-squared | = | 0.9900  |
|          |            |    |            | Root MSE      | = | 20.711  |

| ICU_ad      | Coef.    | Std. Err. | t     | P> t  | [95% Conf. Interval] |          |
|-------------|----------|-----------|-------|-------|----------------------|----------|
| Hospital_ad | .1889516 | .0050633  | 37.32 | 0.000 | .1780131             | .1998902 |
| _cons       | 18.12906 | 7.491698  | 2.42  | 0.031 | 1.944227             | 34.31389 |

```
. twoway (scatter ICU_ad Hospital_ad) (lfit ICU_ad Hospital_ad)
```

| Day | Official Data |     | Forecasts |         |
|-----|---------------|-----|-----------|---------|
|     | Positive      | ICU | Linear    | Squared |
| 1   | 54            | 26  | 28,3      | 17      |
| 2   | 101           | 27  | 37,2      | 28      |
| 3   | 114           | 35  | 39,7      | 31      |
| 4   | 128           | 36  | 42,3      | 34      |
| 5   | 248           | 56  | 65,0      | 61      |
| 6   | 345           | 64  | 83,3      | 82      |
| 7   | 401           | 105 | 93,9      | 94      |
| 8   | 639           | 140 | 138,9     | 146     |
| 9   | 742           | 166 | 158,4     | 167     |
| 10  | 1034          | 229 | 213,6     | 228     |
| 11  | 1346          | 295 | 272,5     | 291     |
| 12  | 1790          | 351 | 356,4     | 378     |
| 13  | 2394          | 462 | 470,6     | 489     |
| 14  | 2651          | 567 | 519,2     | 534     |
| 15  | 3557          | 650 | 690,4     | 683     |

| Interpolation | R Squared | Coefficients |        |        |
|---------------|-----------|--------------|--------|--------|
| Linear        | 0,9908    |              | 0,189  | 18,129 |
| Squared       | 0,9942    | -1,00E-05    | 0,2261 | 5,1106 |
| Exponential   |           |              |        |        |

## Fitting model

### ICU and Positive

$$Y=ax+b$$

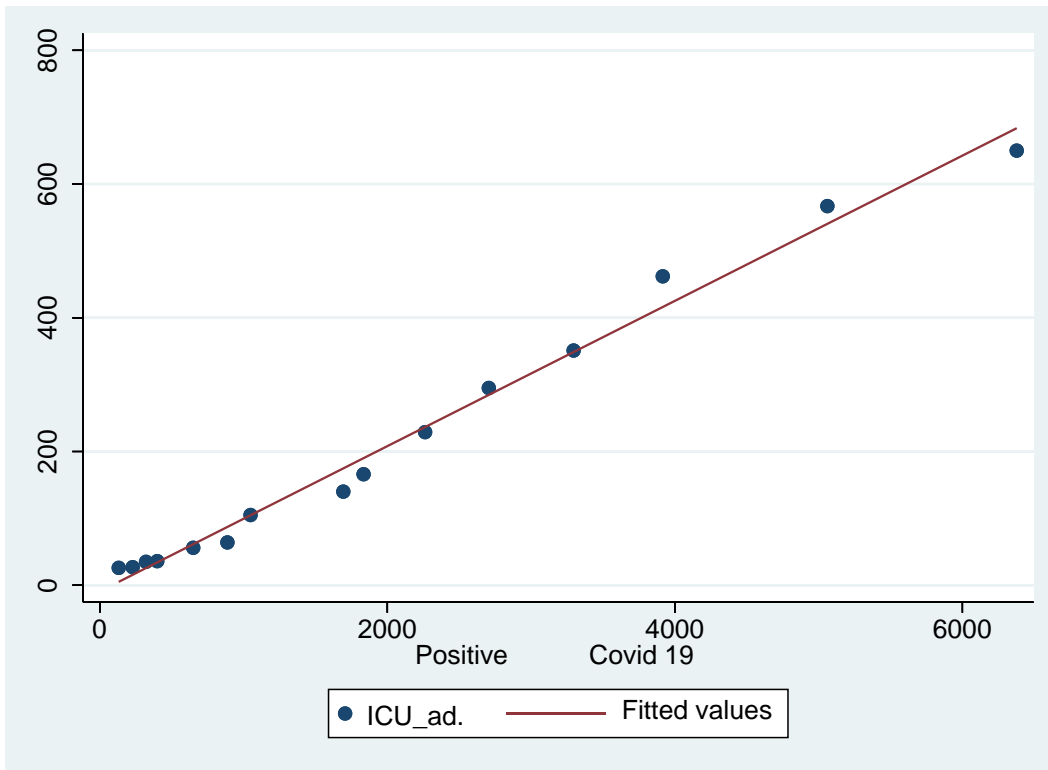

```
. regress ICU_ad PositiveCovid19
```

| Source   | SS         | df | MS         | Number of obs | = | 15      |
|----------|------------|----|------------|---------------|---|---------|
| Model    | 595814.107 | 1  | 595814.107 | F(1, 13)      | = | 1088.96 |
| Residual | 7112.82622 | 13 | 547.140479 | Prob > F      | = | 0.0000  |
| Total    | 602926.933 | 14 | 43066.2095 | R-squared     | = | 0.9882  |
|          |            |    |            | Adj R-squared | = | 0.9873  |
|          |            |    |            | Root MSE      | = | 23.391  |

| ICU_ad          | Coef.     | Std. Err. | t     | P> t  | [95% Conf. Interval] |          |
|-----------------|-----------|-----------|-------|-------|----------------------|----------|
| PositiveCovid19 | .1086243  | .0032917  | 33.00 | 0.000 | .101513              | .1157356 |
| _cons           | -9.246065 | 9.067306  | -1.02 | 0.326 | -28.83479            | 10.34266 |

| Day | Official Data |     | Forecasts |         |
|-----|---------------|-----|-----------|---------|
|     | Positive      | ICU | Linear    | Squared |
| 1   | 132           | 26  | 5,1       | 2       |
| 2   | 229           | 27  | 15,6      | 13      |
| 3   | 322           | 35  | 25,7      | 24      |
| 4   | 400           | 36  | 34,2      | 33      |
| 5   | 650           | 56  | 61,3      | 61      |
| 6   | 888           | 64  | 87,2      | 87      |
| 7   | 1049          | 105 | 104,7     | 105     |
| 8   | 1694          | 140 | 174,7     | 177     |
| 9   | 1835          | 166 | 190,0     | 192     |
| 10  | 2263          | 229 | 236,5     | 239     |
| 11  | 2706          | 295 | 284,6     | 288     |
| 12  | 3296          | 351 | 348,7     | 352     |
| 13  | 3916          | 462 | 416,0     | 419     |
| 14  | 5061          | 567 | 540,4     | 541     |
| 15  | 6378          | 650 | 683,4     | 679     |

| Interpolation | R Squared | Coefficients |        |         |
|---------------|-----------|--------------|--------|---------|
| Linear        | 0,9882    |              | 0,1086 | -9,2461 |
| Squared       | 0,9883    | -7,00E-07    | 0,1128 | -12,422 |
| Exponential   |           |              |        |         |

---

Update from March 15 2020 to March 22 2020







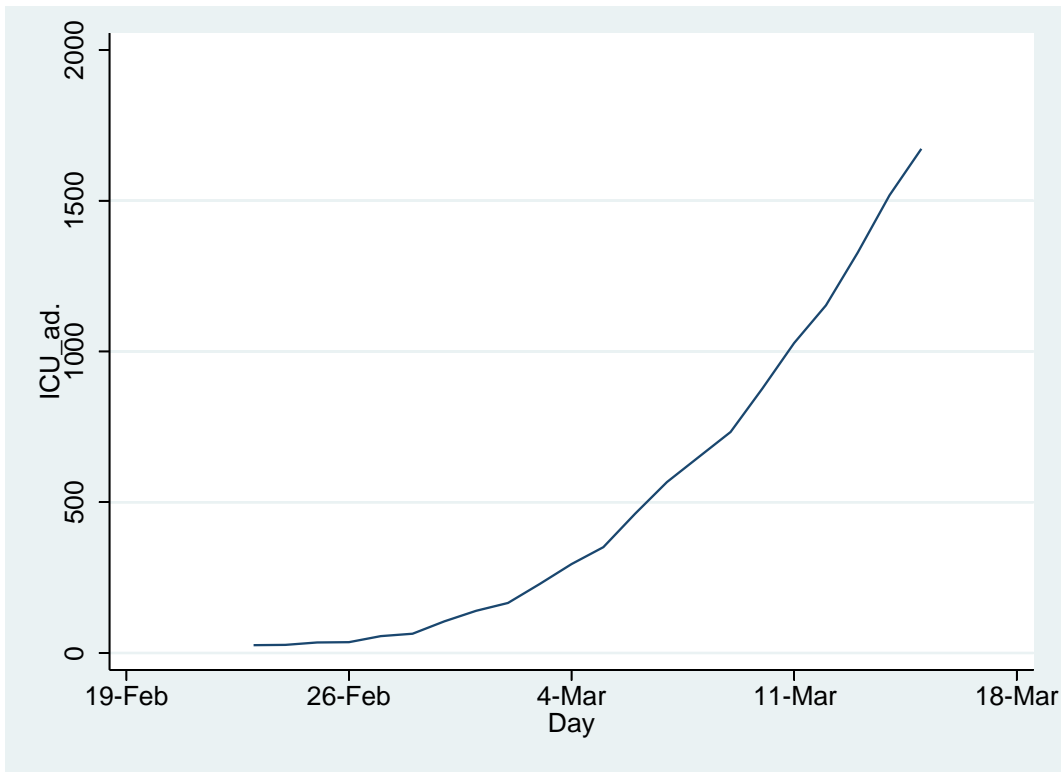

Polynomial-series estimation

Number of obs = 22  
 Polynomial order = 3

| ICU_ad | Effect   | Robust Std. Err. | z      | P> z  | [95% Conf. Interval] |
|--------|----------|------------------|--------|-------|----------------------|
| B      | 79.34285 | .770338          | 103.00 | 0.000 | 77.83302 80.85269    |

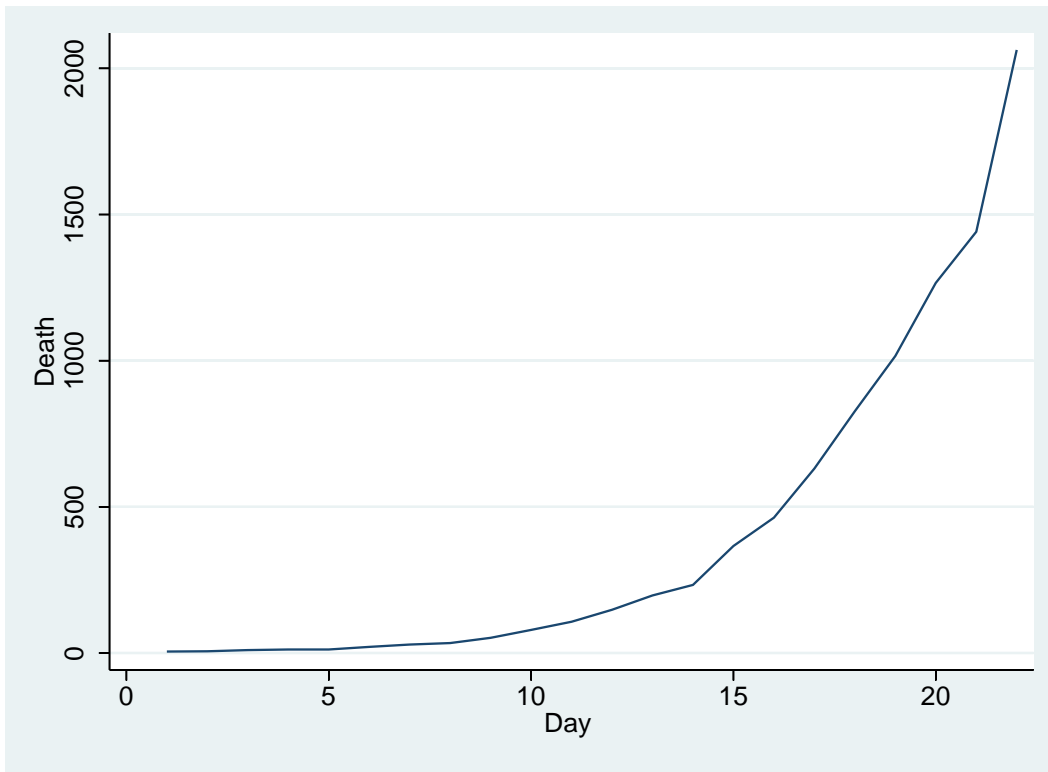

| Death | Effect   | Robust Std. Err. | z     | P> z  | [95% Conf. Interval] |
|-------|----------|------------------|-------|-------|----------------------|
| B     | 98.55183 | 6.213871         | 15.86 | 0.000 | 86.37287 110.7308    |

Note: Effect estimates are averages of derivatives.

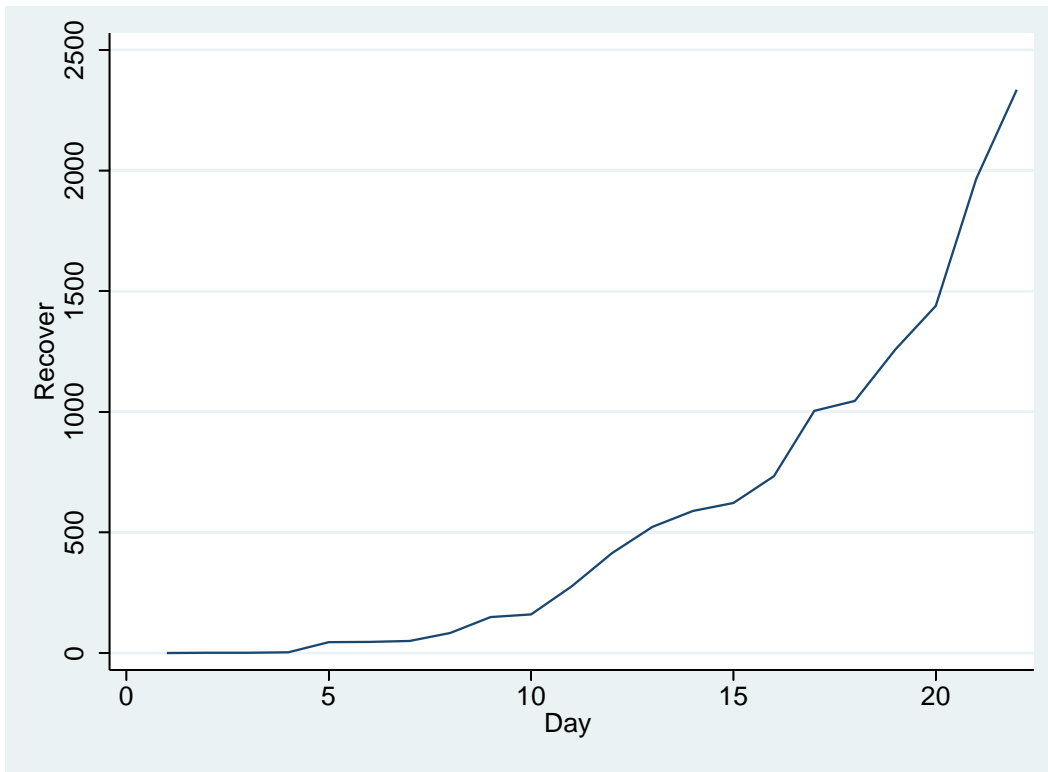

Computing average derivatives

Polynomial-series estimation                      Number of obs        =            22  
                                                                                  Polynomial order    =            3

| Recover | Effect   | Robust<br>Std. Err. | z     | P> z  | [95% Conf. Interval] |          |
|---------|----------|---------------------|-------|-------|----------------------|----------|
| B       | 111.5226 | 5.433796            | 20.52 | 0.000 | 100.8726             | 122.1727 |

Note: Effect estimates are averages of derivatives.
